# Supplementary material for: Comparison of the immunoassay method with the commercial and in-house LC-MS/MS methods for substance abuse in urine
Source: publisher site journal article supplement (doi:10.1515/tjb-2022-0286), 2023-10-19
Supplement: Supplementary file 1 [file j_tjb-2022-0286_suppl_001.docx]

**Supplementary material 1**

Declustering potential (DP), entrance potential (EP), collision energy (CE), cell exit potential (CEP) and retention times (RT) of the commercial LC-MS/MS method for the substances and their internal standards

| **Substance/IS** | **IS** | **Precursor ion (m/z)** | **Product ions (Q3)** | **RT (minute)** | **DP (V)** | **EP (V)** | **CP (V)** | **CEP (V)** |
| --- | --- | --- | --- | --- | --- | --- | --- | --- |
| MA | MA-D5 | 149,9 | 119 | 3.9 | 46 | 10 | 25 | 4 |
| 91 | 3.9 | 17 | 8 |
| MA-D5 | - | 155 | 121.4 | 3.89 | 46 | 10 | 20 | 8 |
| 137 | 3.89 | 25 | 6 |
| 142 | 3.89 | 20 | 6 |
| 151.5 | 3.89 | 25 | 4 |
| 163.1 | 3.89 | 20 | 10 |
| MDA | MDA-D5 | 179,9 | 163.1 | 3.84 | 61 | 10 | 13 | 10 |
| 105 | 3.84 | 33 | 12 |
| 135.2 | 3.84 | 16 | 8 |
| MDA- D5 | - | 185 | 168.2 | 3.82 | 61 | 10 | 20 | 10 |
| AMP | AMP-D11 | 136 | 91 | 3.84 | . | 10 | 23 | 6 |
| 119 | 3.84 | 13 | 8 |
| AMP-D11 | - | 147 | 130.4 | 3.79 | 41 | 10 | 20 | 8 |
| 91 | 3.79 | 20 | 4 |
| MDMA | MDEA-D5 | 193,9 | 163 | 3.89 | 81 | 10 | 20 | 6 |
| 134.9 |
| MDEA |  | 208,1 | 135 | 3.98 | 146 | 10 | 16 | 8 |
|  | 163 | 19 | 8 |
| MDEA-D5 | - | 213 | 163 | 3.95 | 146 | 10 | 25 | 12 |
| Codeine | Codeine-D6 | 300,1 | 164.9 | 3.5 | 86 | 10 | 59 | 12 |
| 114.9 | 3.5 | 86 | 10 | 93 | 8 |
| Codeine-D6 | - | 306 | 165 | 3.53 | 86 | 10 | 50 | 12 |
| Morphine | Morphine-D6 | 285,9 | 151.8 | 0.95 | 96 | 10 | 77 | 12 |
| 165 | 51 |
| Morphine-D6 | - | 292,01 | 181 | 0.95 | 96 | 10 | 47 | 8 |
| 6-MAM | 6-MAM-D3 | 328,1 | 165.1 | 3.7 | 106 | 10 | 33 | 8 |
| 211.1 | 3.7 | 106 | 10 | 35 | 8 |
| 6-MAM- D3 | - | 331,1 | 165 | 3.68 | 106 | 10 | 50 | 8 |
| Diazepam | Diazepam- D5 | 284,9 | 154 | 7.87 | 76 | 10 | 37 | 10 |
| 193 | 45 | 14 |
| Diazepam- D5 | - | 290 | 198 | 7.85 | 76 | 10 | 40 | 10 |
| THC | THC-D3 | 315,2 | 193.1 | 8.38 | -81 | -10 | -33 | -12 |
| 123 | -45 |
| THC-D3 | - | 318,2 | 196.2 | 4.66 | -81 | -10 | -45 | -12 |
| Ephedrine-D3 | - | 169,2 | 115.2 | 3.58 | 41 | 10 | 35 | 4 |
| 151.1 | 3.58 | 41 | 10 | 20 | 8 |
| Pseudoephedrine | Ephedrine-D3 | 166,1 | 148.1 | 3.66 | 40 | 10 | 20 | 6 |
| 133 | 3.66 | 40 | 10 | 20 | 6 |
| THC-COOH | THC-COOH-D9 | 343,1 | 299.1 | 8.2 | -110 | -10 | -28 | -11 |
| 245.1 | 8.2 | -110 | -10 | -36 | -9 |
| 343,1 | 191 | 8.2 | -110 | -10 | -26 | -10 |
| THC-COOH-D9 | - | 352,2 | 308.2 | 8.2 | -95 | -10 | -30 | -9 |
| Buprenorphine | Buprenorphine-D4 | 468,1 | 396.2 | 5.63 | 136 | 10 | 51 | 16 |
| 414.1 | 5.63 | 136 | 10 | 45 | 24 |
| Buprenorphine-D4 | - | 472,4 | 400 | 5.56 | 136 | 10 | 53 | 8 |
| EDDP | EDDP-D3 | 278,1 | 234 | 6.02 | 106 | 10 | 41 | 12 |
| 249.2 | 6.02 | 106 | 10 | 33 | 14 |
| EDDP-D3 | - | 281,2 | 234 | 6 | 106 | 10 | 50 | 6 |
| Oxazepam | Oxazepam-D5 | 287 | 268.8 | 7.66 | 46 | 10 | 21 | 8 |
| 241 | 35 | 16 |
| Oxazepam- D5 | - | 292 | 246 | 7.63 | 46 | 10 | 30 | 8 |
| Clonazepam | Diazepam-D5 | 315,9 | 269.9 | 7.61 | 76 | 10 | 35 | 18 |
| 213.8 | 7.61 | 76 | 10 | 49 | 16 |
| Flurazepam | Oxazepam-D5 | 388,2 | 315.2 | 5.85 | 60 | 10 | 35 | 15 |
| 288 | 5.85 | 60 | 10 | 50 | 15 |
| Ketamine | MDEA-D5 | 238,1 | 125 | 4.03 | 1 | 10 | 35 | 6 |
| 220 | 4.03 | 1 | 10 | 20 | 6 |
| Lorazepam | Diazepam-D5 | 321 | 275.1 | 7.69 | 46 | 10 | 31 | 4 |
| 303 | 7.69 | 46 | 10 | 35 | 4 |
| Methadone | Methadone-D3 | 310,2 | 265.2 | 7.52 | 61 | 10 | 33 | 6 |
| 77 | 7.52 | 61 | 10 | 69 | 8 |
| Methadone-D3 | - | 313,2 | 268 | 7.49 | 61 | 10 | 25 | 4 |
| Midazolam | Diazepam-D5 | 326 | 291 | 5.99 | 91 | 10 | 37 | 8 |
| 223 | 5.99 | 91 | 10 | 51 | 16 |
| Oxycodone | Oxycodone-D3 | 316,1 | 241.1 | 3.61 | 75 | 10 | 38 | 8 |
| 256 | 3.61 | 75 | 10 | 33 | 10 |
| Oxycodone-D3 | - | 319 | 301 | 3.58 | 75 | 10 | 35 | 20 |
