# Supplementary material for: Comparison of the immunoassay method with the commercial and in-house LC-MS/MS methods for substance abuse in urine
Source: publisher site journal article supplement (doi:10.1515/tjb-2022-0286), 2023-10-19
Supplement: Supplementary file 2 [file j_tjb-2022-0286_suppl_002.docx]

**Supplementary material 2**

Declustering potential (DP), entrance potential (EP), collision energy (CE), cell exit potential (CEP) and retention times (RT) of the in-house LC-MS/MS method for the substances and their internal standards

| **Substance/IS** | **IS** | **Precursor ion (m/z)** | **Product ions (Q3)** | **RT (minute)** | **DP (V)** | **EP (V)** | **CP (V)** | **CEP (V)** |
| --- | --- | --- | --- | --- | --- | --- | --- | --- |
| BZE | BZE-D3 | 290.1 | 168.1 | 4.09 | 71 | 10 | 20 | 12 |
| 105.1 | 4.09 | 35 |
| BZE-D3 | - | 293 | 171 | 4.06 | 71 | 10 | 35 | 12 |
| Cocaethylene | BZE-D3 | 318.1 | 196.2 | 4.67 | 121 | 10 | 27 | 14 |
| 105 | 4.67 | 121 | 10 | 51 | 6 |
| Cocaine | Cocaine-D3 | 304.1 | 182.1 | 4.29 | 61 | 10 | 20 | 6 |
| 105 | 4.29 | 61 | 10 | 50 | 12 |
| Cocaine-D3 | - | 307 | 185.4 | 4.28 | 61 | 10 | 35 | 14 |
| MA | MA-D5 | 149.9 | 119 | 3.9 | 46 | 10 | 13 | 8 |
| 117 | 3.9 | 20 | 6 |
| 107 | 3.9 | 20 | 6 |
| MA-D5 | - | 155 | 121.4 | 3.89 | 46 | 10 | 20 | 8 |
| 137 | 3.89 | 25 | 6 |
| 142 | 3.89 | 20 | 6 |
| 151.5 | 3.89 | 25 | 4 |
| 163.1 | 3.89 | 20 | 10 |
| MDA | MDA-D5 | 179.9 | 135 | 3.84 | 61 | 10 | 20 | 12 |
| 168.2 | 3.84 | 10 |
| MDA- D5 | - | 185 | 168.2 | 3.82 | 61 | 10 | 20 | 10 |
| AMP | AMP-D11 | 136 | 91 | 3.84 | 41 | 10 | 20 | 6 |
| 119 | 3.84 | 13 | 8 |
| AMP-D11 | - | 147 | 130.4 | 3.79 | 41 | 10 | 20 | 8 |
| 91 | 3.79 | 20 | 4 |
| MDMA | MDEA-D5 | 193.9 | 163 | 3.89 | 81 | 10 | 20 | 6 |
| 134.9 |
| MDEA |  | 208.1 | 135 | 3.98 | 146 | 10 | 20 | 8 |
| MDEA-D5 |
|  | 163 | 3.98 | 12 |
| MDEA-D5 | - | 213 | 163 | 3.95 | 146 | 10 | 25 | 12 |
| Heroin | Heroin-D3 | 370 | 328 | 4.12 | 96 | 10 | 35 | 12 |
| 165 | 4.12 | 96 | 10 | 50 | 12 |
| Heroin-D3 | - | 373 | 271 | 4.1 | 96 | 10 | 40 | 12 |
| Codeine | Codeine-D6 | 300.1 | 164.9 | 3.5 | 86 | 10 | 50 | 12 |
| 153 | 3.5 | 86 | 10 | 50 | 8 |
| Codeine-D6 | - | 306 | 165 | 3.53 | 86 | 10 | 50 | 12 |
| Morphine | Morphine-D6 | 285.9 | 153 | 0.95 | 96 | 10 | 50 | 8 |
| 165 | 12 |
| Morphine-D6 | - | 292.01 | 181 | 0.95 | 96 | 10 | 50 | 8 |
| 6-MAM | 6-MAM-D3 | 328.1 | 165.1 | 3.7 | 106 | 10 | 50 | 8 |
| 211.1 | 3.7 | 106 | 10 | 35 | 8 |
| 6-MAM- D3 | - | 331.1 | 165 | 3.68 | 106 | 10 | 50 | 8 |
| Diazepam | Diazepam- D5 | 284.9 | 154 | 7.87 | 76 | 10 | 35 | 10 |
| 193 | 14 |
| Diazepam- D5 | - | 290 | 198 | 7.85 | 76 | 10 | 40 | 10 |
| Midazolam | Diazepam- D5 | 326 | 291 | 5.99 | 91 | 10 | 35 | 8 |
|  |  | 326 | 249 |  |  |  |  | 16 |
| THC | THC-D3 | 315.2 | 193.1 | 8.38 | -81 | -10 | -33 | -12 |
| 259 | -45 |
| THC-D3 | - | 318.2 | 196.2 | 4.66 | -81 | -10 | -45 | -12 |
| 1-(4-Chlorophenyl)piperazine | Ephedrine-D3 | 197 | 118 | 4.58 | 41 | 10 | 35 | 6 |
| 154 |
| 11-OH THC | THC-COOH-D9 | 331.2 | 313 | 8.14 | -86 | -10 | -21 | -16 |
| 193 | -33 | -8 |
| Cannabidiol | THC-D3 | 315 | 193 | 8.19 | -60 | -10 | -20 | -6 |
| 259 | 8.19 | -60 | -10 | -20 | -6 |
| THC-COOH | THC-COOH-D9 | 343.1 | 299.1 | 8.2 | -95 | -10 | -30 | -9 |
| 245.1 | 8.2 | -95 | -10 | -40 | -17 |
| THC-COOH-D9 | - | 352.2 | 308.2 | 8.2 | -95 | -10 | -30 | -9 |
| 4-OH-N-methylamphetamine | MA-D5 | 166 | 107 | 3.41 | 46 | 10 | 20 | 6 |
| 135 | 6 |
| Buprenorphine | Buprenorphine-D4 | 468.1 | 396.2 | 5.63 | 136 | 10 | 53 | 16 |
| 165.1 | 5.63 | 136 | 10 | 125 | 8 |
| Buprenorphine-D4 | - | 472.4 | 400 | 5.56 | 136 | 10 | 53 | 8 |
| EDDP | EDDP-D3 | 278.1 | 234 | 6.02 | 106 | 10 | 35 | 8 |
| 186 | 6.02 | 106 | 10 | 50 | 6 |
| EDDP-D3 | - | 281.2 | 234 | 6 | 106 | 10 | 50 | 6 |
| Alprazolam | Diazepam-D5 | 309 | 274 | 7.63 | 91 | 10 | 35 | 6 |
| 281 | 7.63 | 91 | 10 | 35 | 8 |
| Oxazepam | Oxazepam-D5 | 287 | 268.8 | 7.66 | 46 | 10 | 20 | 8 |
| 241 | 35 | 16 |
| Oxazepam- D5 | - | 292 | 246 | 7.63 | 46 | 10 | 30 | 8 |
| APINACA | AM-2201-D5 | 366.2 | 135.2 | 8.53 | 41 | 10 | 35 | 10 |
| AM-2201 | AM-2201-D5 | 360.2 | 155 | 8.01 | 41 | 10 | 50 | 6 |
| 232.2 | 8.01 | 41 | 10 | 35 | 6 |
| AM-2201-D5 | - | 365.2 | 127.1 | 9.14 | 65 | 10 | 50 | 16 |
| 155.1 | 35 | 10 |
| A-PVP | Cathinone-D5 | 232 | 91 | 4.29 | 41 | 10 | 35 | 16 |
| 161 | 4.29 | 41 | 10 | 35 | 18 |
| Clonazepam | Diazepam-D5 | 315.9 | 214 | 7.61 | 76 | 10 | 50 | 14 |
| 270 | 7.61 | 76 | 10 | 35 | 6 |
| AB-CHMINACA | AM-2201-D5 | 357 | 312 | 8.03 | 66 | 10 | 23 | 8 |
| 340.1 | 15 | 8 |
| AB-PINACA | AM-2201-D5 | 331 | 286 | 7.96 | 41 | 10 | 20 | 6 |
| 314 | 7.96 | 41 | 10 | 20 | 6 |
| Cumyl-Butinaca | AM-2201-D5 | 336 | 201 | 8.13 | 41 | 10 | 20 | 12 |
| 218 | 8.13 | 41 | 10 | 20 | 8 |
| Phenazepam | Diazepam-D5 | 351 | 206 | 7.82 | 91 | 10 | 50 | 6 |
| 287 | 7.82 | 91 | 10 | 35 | 12 |
| Phencyclidine | Phencyclidine-D5 | 244 | 117 | 5.01 | 41 | 10 | 35 | 12 |
| 159 | 5.01 | 41 | 10 | 20 | 12 |
| Phencyclidine-D5 | - | 249 | 164 | 4.96 | 41 | 10 | 25 | 18 |
| Fentanyl | Fentanyl-D5 | 337 | 188 | 5.27 | 96 | 10 | 35 | 18 |
| 105 | 5.27 | 96 | 10 | 50 | 15 |
| Fentanyl-D5 | - | 342 | 188 | 5.22 | 96 | 10 | 35 | 15 |
| Flunitrazepam | Diazepam-D5 | 313.9 | 267.9 | 7.59 | 76 | 10 | 35 | 6 |
| 238.9 | 7.59 | 76 | 10 | 50 | 6 |
| Flurazepam | Oxazepam-D5 | 388.2 | 315.2 | 5.85 | 60 | 10 | 20 | 6 |
| 288 | 5.85 | 60 | 10 | 35 | 12 |
| Hydromorphone | Hydromorphone-D3 | 286 | 153 | 0.95 | 96 | 10 | 50 | 6 |
| 185 | 0.95 | 96 | 10 | 35 | 6 |
| Hydromorphone-D3 | - | 289 | 185 | 0.95 | 96 | 10 | 50 | 6 |
| Gabapentin | Gabapentin-D4 | 172 | 137 | 3.75 | 41 | 10 | 20 | 12 |
| 154 | 3.75 | 41 | 10 | 20 | 12 |
| Gabapentin-D4 | - | 176 | 158 | 3.74 | 41 | 10 | 25 | 12 |
| Hydrocodone | Hydrocodone-D3 | 300 | 128 | 3.53 | 86 | 10 | 59 | 12 |
| 199 | 3.53 | 86 | 10 | 35 | 12 |
| Hydrocodone-D3 | - | 303 | 199 | 3.68 | 86 | 10 | 40 | 6 |
| JWH-122 | AM-2201-D5 | 356 | 169 | 8.22 | 41 | 10 | 35 | 6 |
| 214 | 8.22 | 41 | 10 | 35 | 6 |
| JWH-200 | AM-2201-D5 | 385 | 114 | 7.54 | 41 | 10 | 35 | 8 |
| 155 | 7.54 | 41 | 10 | 35 | 8 |
| JWH-250 | AM-2201-D5 | 336 | 121 | 8.08 | 41 | 10 | 35 | 6 |
| 200 | 8.08 | 41 | 10 | 35 | 6 |
| Cathinone | Cathinone-D5 | 150 | 117 | 3.55 | 41 | 10 | 20 | 6 |
| 132 | 3.55 | 41 | 10 | 20 | 8 |
| Cathinone-D5 | - | 155 | 137 | 3.54 | 41 | 10 | 25 | 6 |
| Ketamine | MDEA-D5 | 238.1 | 125 | 4.03 | 1 | 10 | 35 | 6 |
| 220 | 4.03 | 1 | 10 | 20 | 6 |
| LSD | LSD-D3 | 324 | 223 | 4.57 | 41 | 10 | 35 | 4 |
| 281 | 4.57 | 41 | 10 | 35 | 10 |
| LSD-D3 | - | 327 | 226 | 4.55 | 41 | 10 | 35 | 10 |
| Lorazepam | Diazepam-D5 | 321 | 275.1 | 7.69 | 46 | 10 | 35 | 8 |
| 303 | 7.69 | 46 | 10 | 20 | 8 |
| MDMB-CHMICA | AM-2201-D5 | 385.5 | 144 | 8.14 | 41 | 10 | 50 | 8 |
| 240 | 8.14 | 41 | 10 | 35 | 6 |
| Methadone | Methadone-D3 | 310.2 | 265.2 | 7.52 | 61 | 10 | 20 | 8 |
| 105 | 7.52 | 61 | 10 | 35 | 8 |
| Methadone-D3 | - | 313.2 | 268 | 7.49 | 61 | 10 | 25 | 4 |
| Methylphenidate | AMP-D11 | 234 | 84 | 4.26 | 106 | 10 | 25 | 8 |
| 91.1 | 4.26 | 106 | 10 | 61 | 16 |
| Midazolam | Diazepam-D5 | 326 | 291 | 5.99 | 91 | 10 | 35 | 12 |
| 249 | 5.99 | 91 | 10 | 50 | 12 |
| Oxymorphone | Oxymorphone-D3 | 302 | 198 | 0.95 | 96 | 10 | 46 | 8 |
| 227 | 0.95 | 96 | 10 | 26 | 8 |
| Oxymorphone-D3 | - | 305 | 287 | 0.94 | 96 | 10 | 40 | 6 |
| Oxycodone | Oxycodone-D3 | 316.1 | 241.1 | 3.61 | 75 | 10 | 35 | 8 |
| 298 | 3.61 | 75 | 10 | 20 | 10 |
| Oxycodone-D3 | - | 319 | 301 | 3.58 | 75 | 10 | 35 | 20 |
| PB-22 | AM-2201-D5 | 359 | 214 | 8.09 | 41 | 10 | 20 | 16 |
| Piperazine | Morphine-D6 | 87 | 70.1 | 0.87 | 56 | 10 | 21 | 6 |
| 56.1 | 0.87 | 56 | 10 | 29 | 6 |
| Pregabaline | Pregabalin-D4 | 160 | 124 | 3.78 | 41 | 10 | 20 | 4 |
| 142 | 3.78 | 41 | 10 | 20 | 4 |
| Pregabalin-D4 | - | 164 | 146 | 3.75 | 41 | 10 | 20 | 8 |
| Pseudoephedrine | Ephedrine-D3 | 166.1 | 148.1 | 3.66 | 40 | 10 | 20 | 6 |
| 133 | 3.66 | 40 | 10 | 20 | 6 |
| Ephedrine-D3 | - | 169.2 | 115.2 | 3.58 | 41 | 10 | 35 | 8 |
| 151.1 | 20 | 10 |
| RCS-4 | AM-2201-D5 | 322.1 | 135 | 8.09 | 41 | 10 | 50 | 12 |
| 214 | 8.09 | 41 | 10 | 50 | 12 |
| Thebaine | Morphine-D6 | 312 | 249 | 4.1 | 96 | 10 | 35 | 6 |
| 281 | 4.1 | 96 | 10 | 35 | 8 |
| XLR-11 | AM-2201-D5 | 330 | 125 | 8.1 | 41 | 10 | 35 | -9 |
| 232 | 8.1 | 41 | 10 | 35 | -17 |
