# Supplementary material for: Comparison of the immunoassay method with the commercial and in-house LC-MS/MS methods for substance abuse in urine
Source: publisher site journal article supplement (doi:10.1515/tjb-2022-0286), 2023-10-19
Supplement: Supplementary file 3 [file j_tjb-2022-0286_suppl_003.docx]

**Supplementary material 3**

Sociodemographic and questionnaire data of the volunteers

| **Variable** | **Results** |
| --- | --- |
|  | **Mean ± SD** |
| *Age* | 38.9 ± 8.26 |
| **Male (*n*=92)** | 29.4 ± 8.43 |
| **Female (*n*=8)** | 24.1± 3.23 |
|  | **Number of the volunteers** |
| *Cigarette* |  |
| **Yes** | 94 |
| **No** | 6 |
| *Alcohol* |  |
| **Male** | 66 |
| **Female** | 34 |
| *Last used substance* |  |
| **Heroin** | 43 |
| **Cannabis** | 33 |
| **Other** | 24 |
| *Timing of the last substance used* |  |
| **<6 hours** | 18 |
| **6-12 hours before** | 31 |
| **24 hours before** | 7 |
| **48 hours before** | 15 |
| **> 72 hours** | 29 |
| *Frequency of use of the last used substance* |  |
| **Once A Day** | 43 |
| **More Than One Day** | 28 |
| **Once A Week** | 12 |
| **More Than One Week** | 12 |
| **Once A Month** | 4 |
| **More Than One Month** | 1 |
